# Supplementary material for: ZFP161 regulates replication fork stability and maintenance of genomic stability by recruiting the ATR/ATRIP complex
Source: PubMed Central journal article supplement (PMC6876566; doi:10.1038/s41467-019-13321-z), 2019-11-22
Supplement: 41467_2019_13321_MOESM1_ESM.pdf [file 41467_2019_13321_MOESM1_ESM.pdf]

# Supplementary Information

## **ZFP161 regulates replication fork stability and maintenance of genomic stability by recruiting the ATR/ATRIP complex**

Kim *et al.*

This PDF includes:

Supplementary Figures 1 - 5

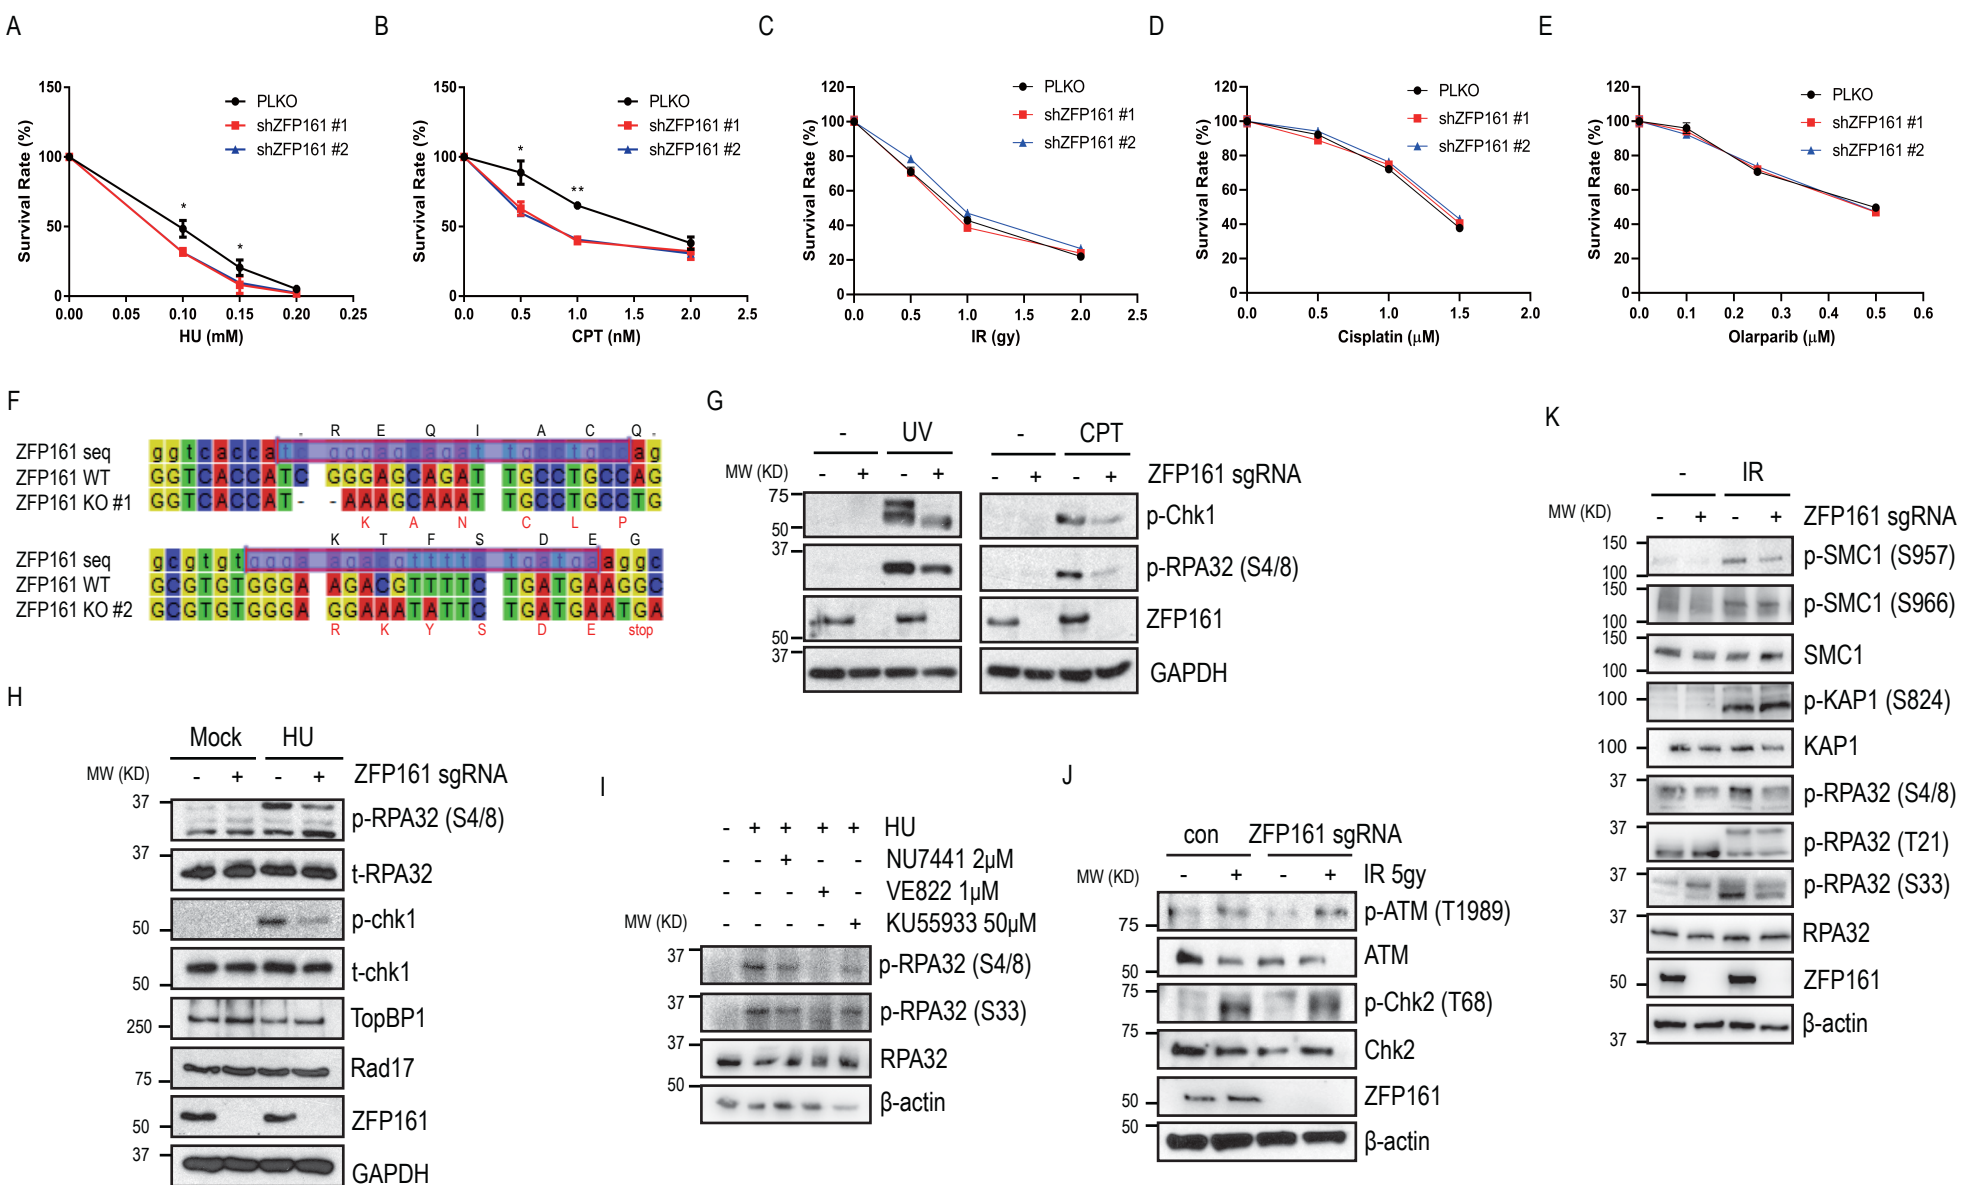

### Supplemental Figure 1. ZFP161 is involved in ATR pathway but not ATM pathway

A - E. HCT116 cells with or without ZFP161 expression were plated and treated with Hydroxyurea (HU, mM) (A), Camptothecin (CPT, nM) (B), ionizing irradiation (IR, Gy) (C), Cisplatin,  $\mu\text{M}$  (D) and Olaparib,  $\mu\text{M}$  (E). After 14 days, colony numbers were counted. F. Genomic DNA was isolated and the ZFP161 locus was amplified using PCR. PCR products were analyzed by sequencing. G - H. After 2h UV, CPT (G), HU (H), total cell lysates were immunoblotted using indicated antibodies. I. Cells were pre-treated different inhibitors (VE-822 1 $\mu\text{M}$ , NU7441 2 $\mu\text{M}$ , KU55933 50  $\mu\text{M}$ ) for 1h then cells were treated 10mM HU for 2h. Total cell lysates were immunoblotted using indicated antibodies. J - K. 2h after IR treatment, total cell lysates were blotted using indicated antibodies. The graphs represent mean  $\pm$  SD, two-tailed, paired t-test; n = 3 independent experiments.

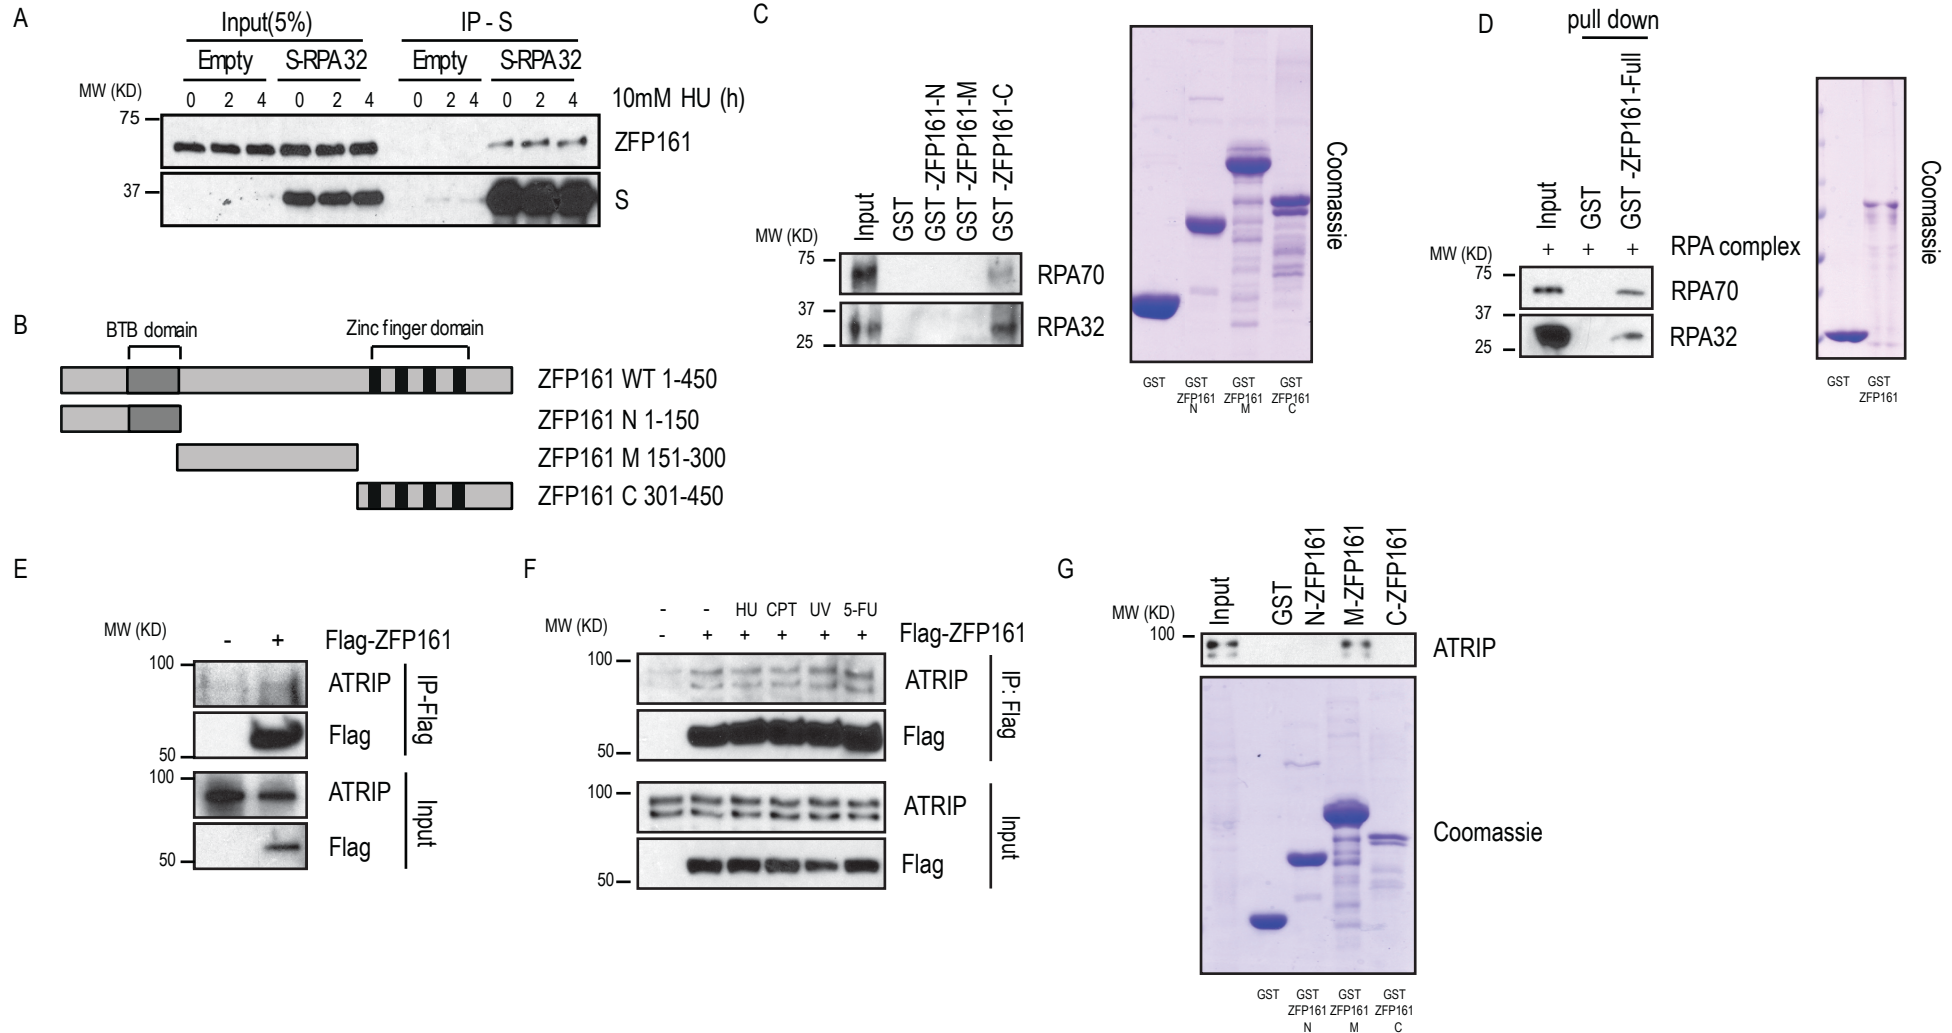

**Supplemental Figure 2. ZFP161 directly interacts with the RPA complex and ATR/ATRIP.**

A. HEK293T cells were transfected with constructs encoding S-tag RPA32. 48 hours later, cells were incubated with HU for indicated time points. Whole cell lysates were used for immunoprecipitation with S-tagged beads. Blots were probed with the indicated antibodies. B. The schema of ZFP161 constructs used for GST pull-down assay. C. Whole cell extracts were subjected to pull-down using GST-ZFP161 (Full, N-term, M-term, C-term) and immunoblotted with indicated antibodies. D. Purified RPA complexes were incubated with GST or GST-ZFP161 for 30min and immunoblotted with indicated antibodies. E - F. HEK293T cells were transfected with Flag-tagged ZFP161. 48hrs later, cells were treated with the indicated replication stress inducing agents. Whole cell lysates were used for immunoprecipitation with Flag-tagged beads. Blots were probed with indicated antibodies. G. Whole cell extracts were subjected to pull-down using GST-ZFP161 (Full, N-term, M-term, C-term) and immunoblotted with indicated antibodies.

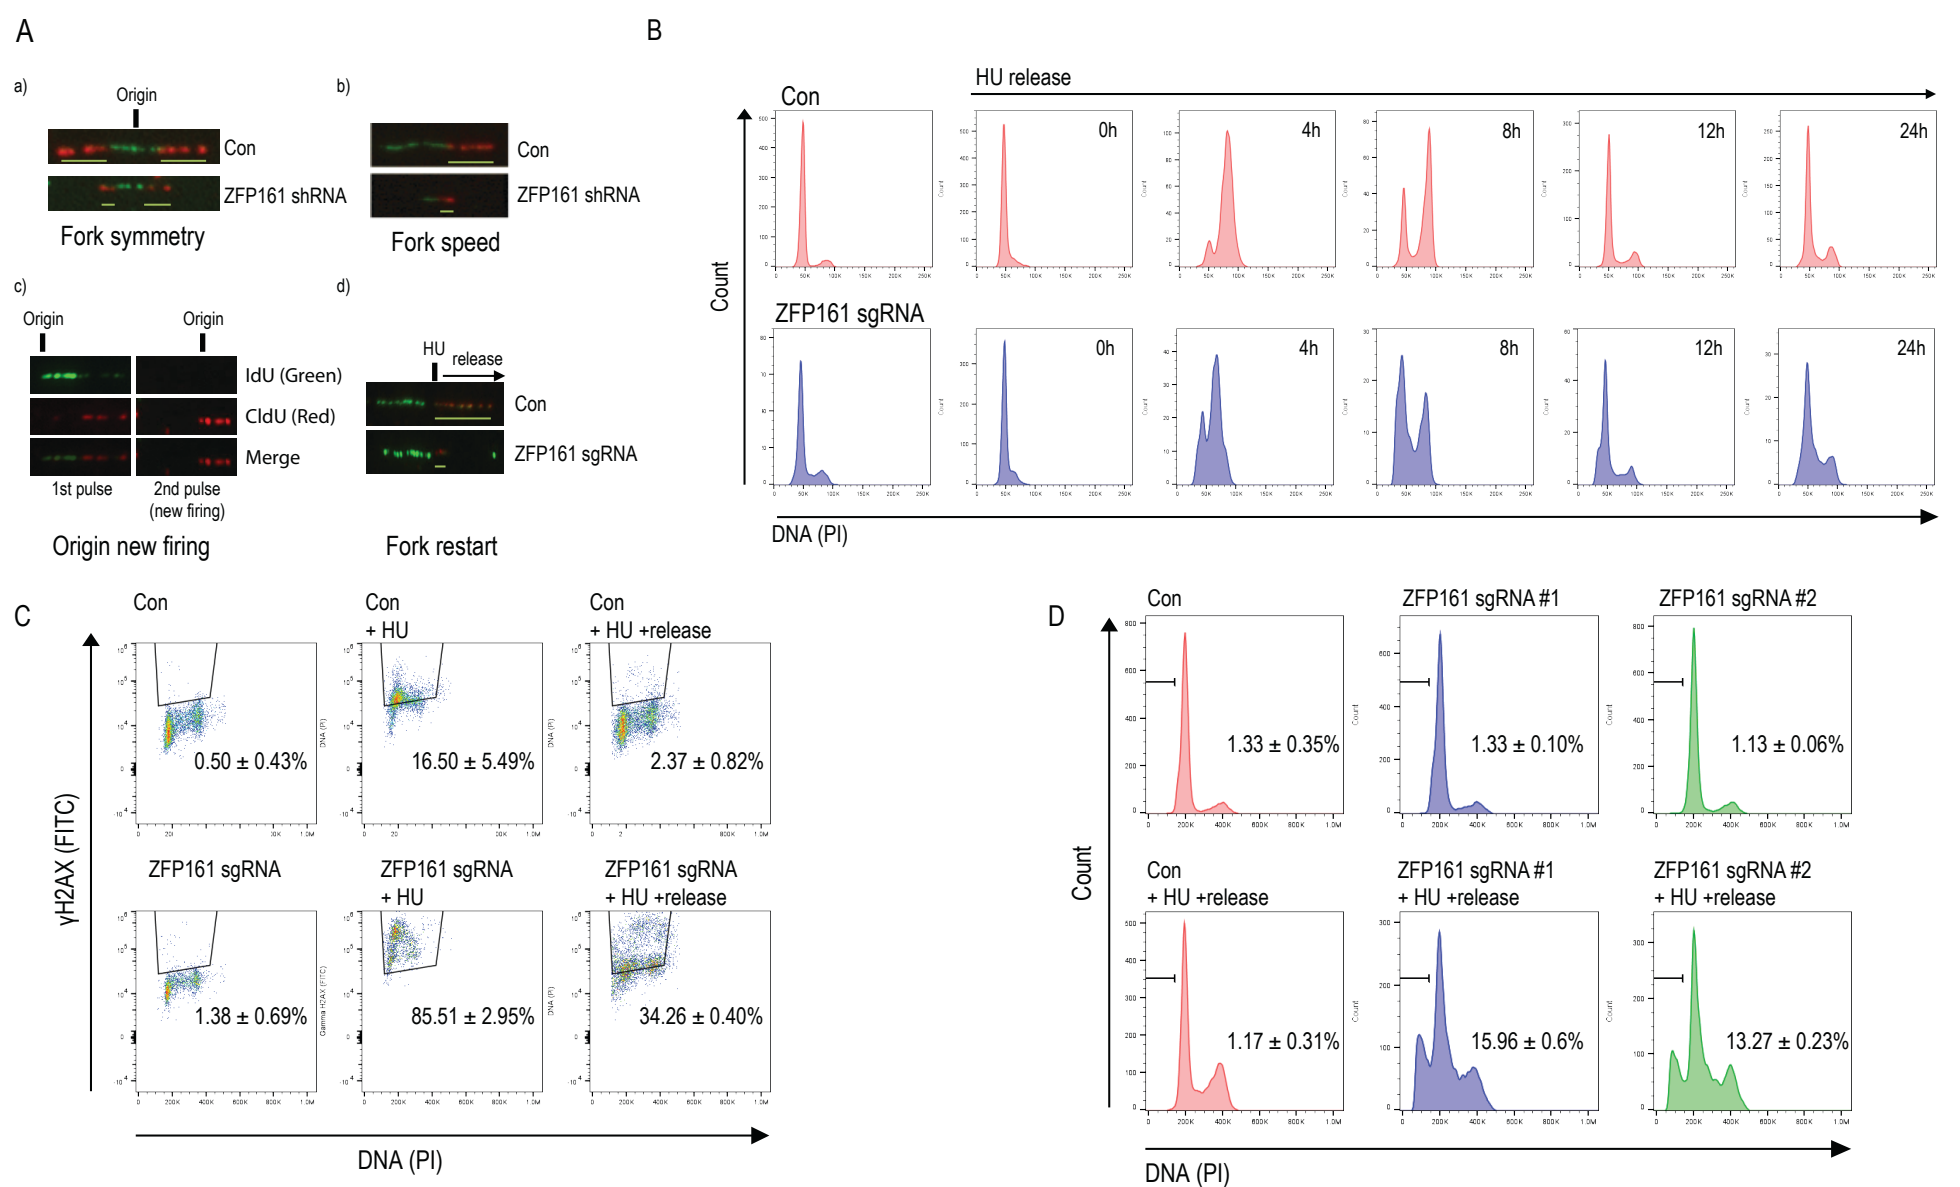

**Supplemental Figure 3. ZFP161 enhances stalled replication fork restart**

A. Representative images of DNA fibers. Replication parameters observed by DNA fiber assay and their interpretations. B – D. HCT116 cells were treated with 2mM HU for 24 hours and released. Cells were collected and cell cycle profile (D),  $\gamma$ -H2AX (C), and sub G1 population (an indicator of cell death) (D), were determined by flow cytometry. Shown are representative profiles after indicated treatment. The plots represent mean  $\pm$  SD, two-tailed, paired t-test; n = 3 independent experiments.

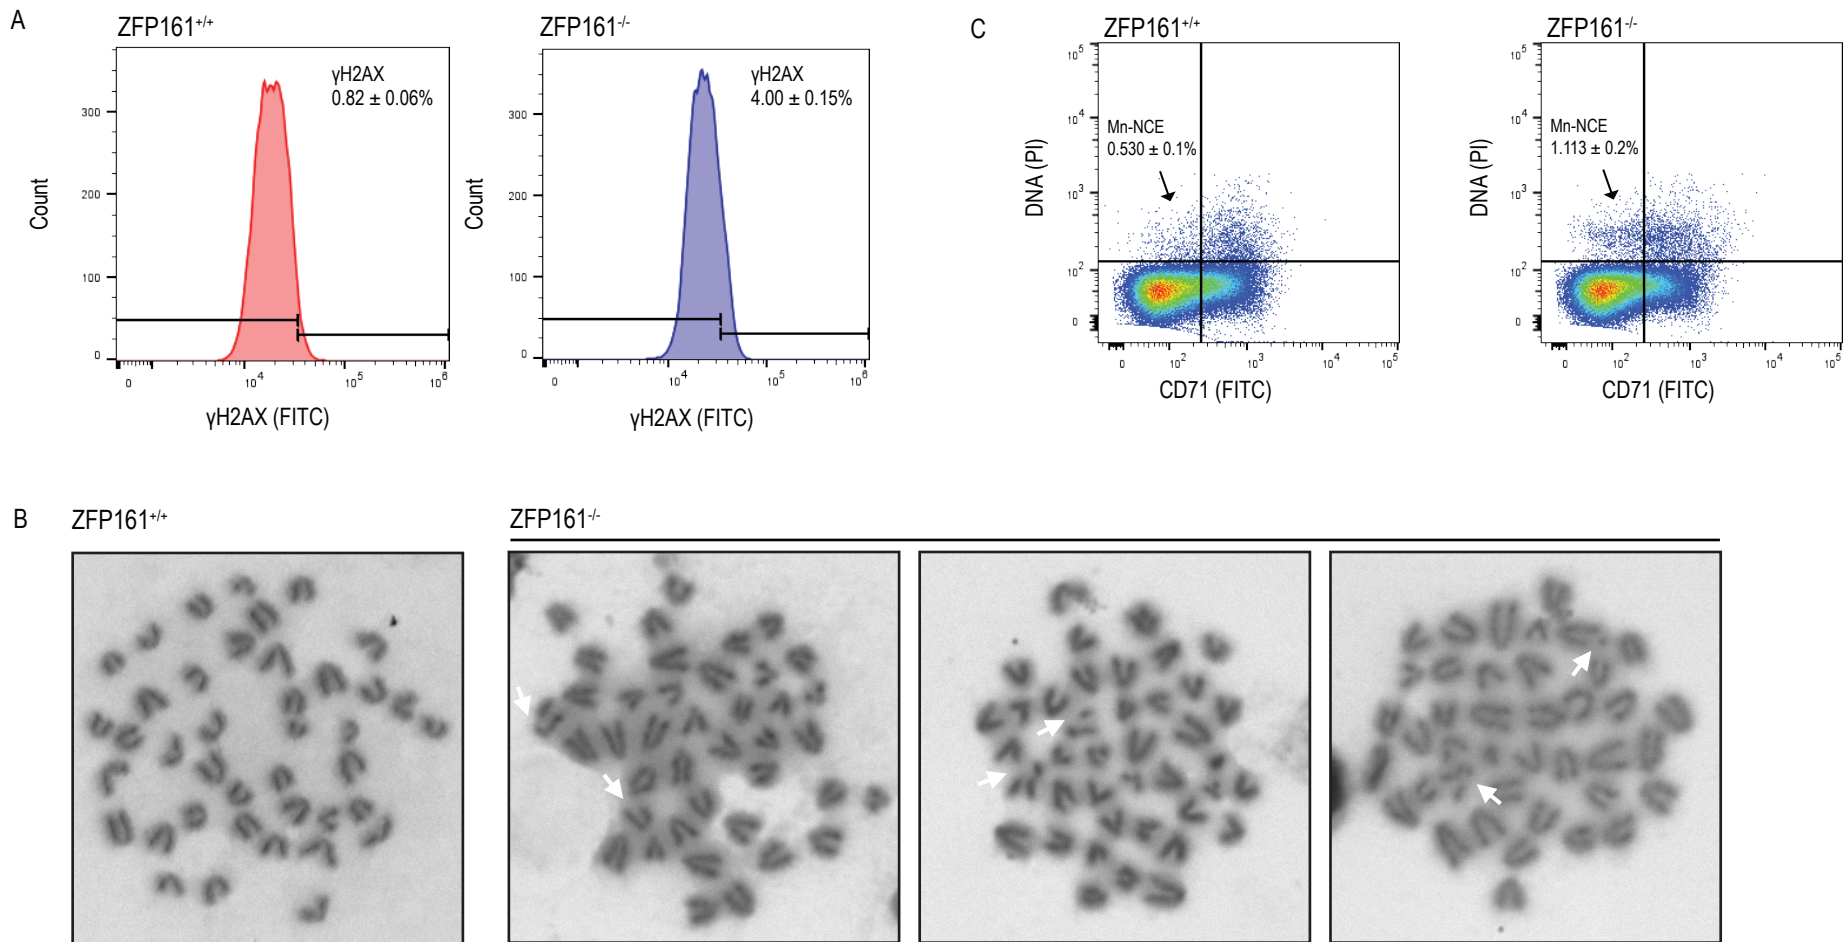

### Supplemental Figure 4. ZFP161 Maintains Genomic Stability

A - C. Treatment of mice to assess genomic instability as indicated by  $\gamma$ H2AX (A), metaphase spread (B), and population of micronucleated normochromic erythrocytes (Mn-NCE, CD71-PI+) (C). Chromosomal instability was determined by counting cells that have chromosome breaks and loss. White arrows indicate chromosome break or chromosome loss. Data are represent mean  $\pm$  SD, two-tailed, paired t-test; n = 3 independent experiments. represented as mean  $\pm$  SD of three independent experiments.

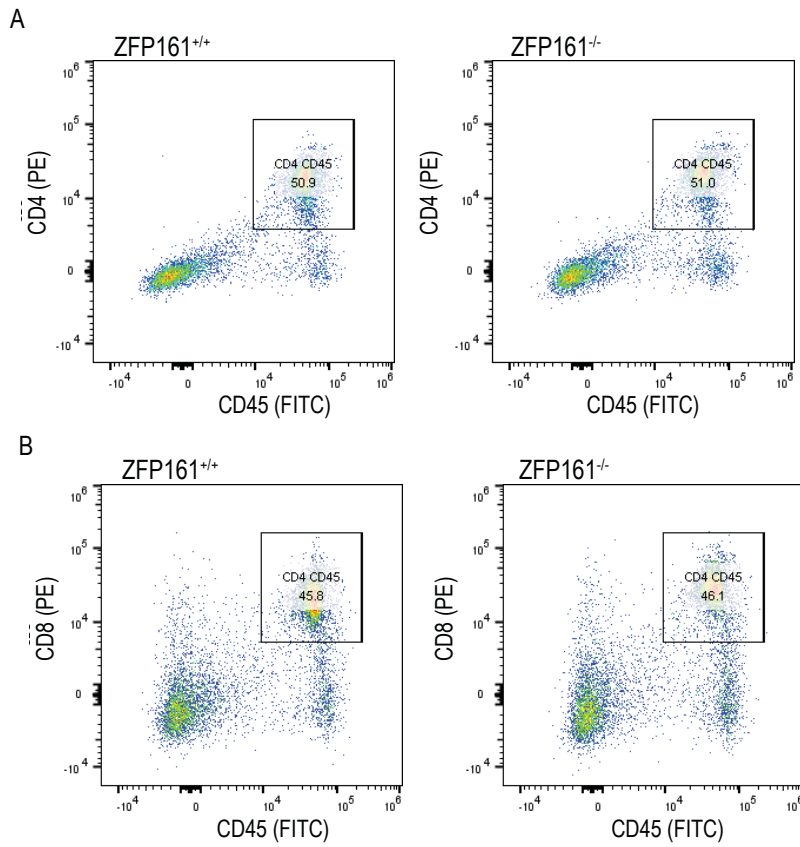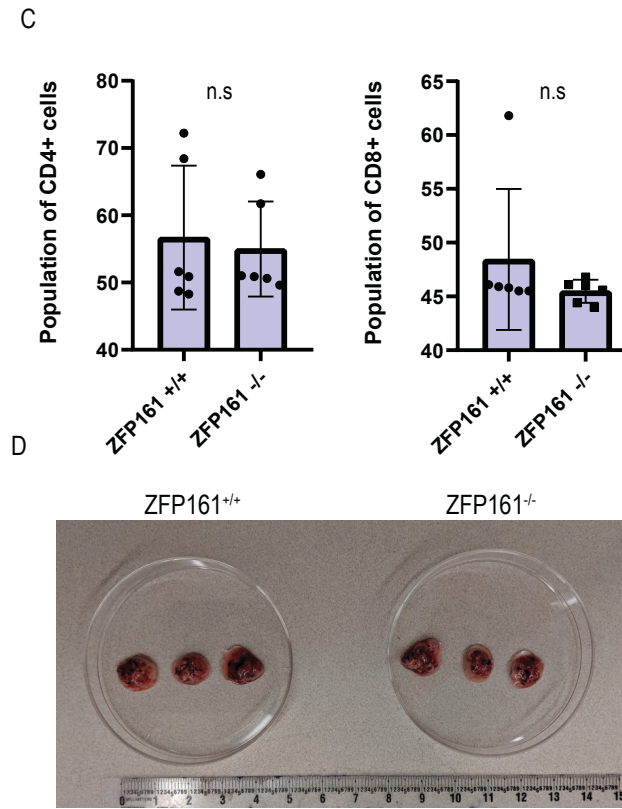

**Supplemental Figure 5. ZFP161 does not affect Thymus cellularity**

A - C. T cell differentiation are determined using indicated antibodies. CD4<sup>+</sup>, CD45<sup>+</sup> (A), CD8<sup>+</sup>, CD45<sup>+</sup> (B) T cells are determined by flow cytometry. The percentage of T cell populations were quantified (C). D. Photograph of thymus isolated from WT (left) and ZFP161 Knockout (right) mice. Data are represent mean  $\pm$  SD, two-tailed, paired t-test; n = 3 independent experiments.
